# Supplementary material for: One-step prepared nano-in-micro microcapsule delivery vehicle with sequential burst–sustained drug release for the targeted treatment of inflammatory bowel disease
Source: Royal Society of Chemistry journal article supplement (doi:10.1039/d1qm00589h), 2021-01-01
Supplement: d1qm00589h1.pdf [file d1qm00589h1.pdf]

## **Electronic Supplementary Information**

**One-step prepared nano-in-micro microcapsule delivery vehicle with sequential burst-sustained drug release for the targeted treatment of inflammatory bowel disease**

Jingjing Jiang, Jingcheng Xiao, Zexu Zhao, Mao-Sen Yuan\* and Jinyi Wang\*

*College of Chemistry & Pharmacy, Northwest A&F University, Yangling, Shaanxi, 712100, China*

**E-mails:** [jywang@nwsuaf.edu.cn](mailto:jywang@nwsuaf.edu.cn) and [yuanms@nwsuaf.edu.cn](mailto:yuanms@nwsuaf.edu.cn)

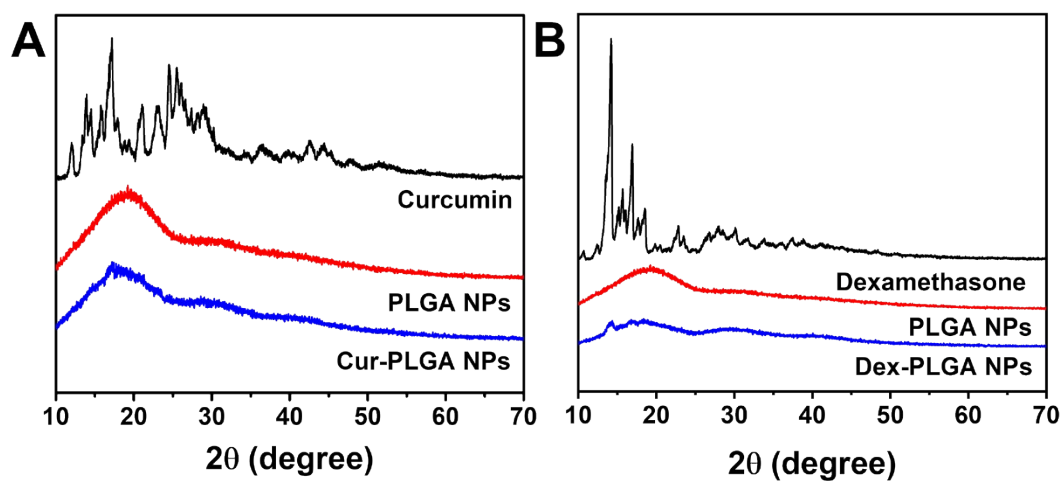

**Fig. S1** The XRD pattern of PLGA NPs before and after loading curcumin (A) and dexamethasone (B).

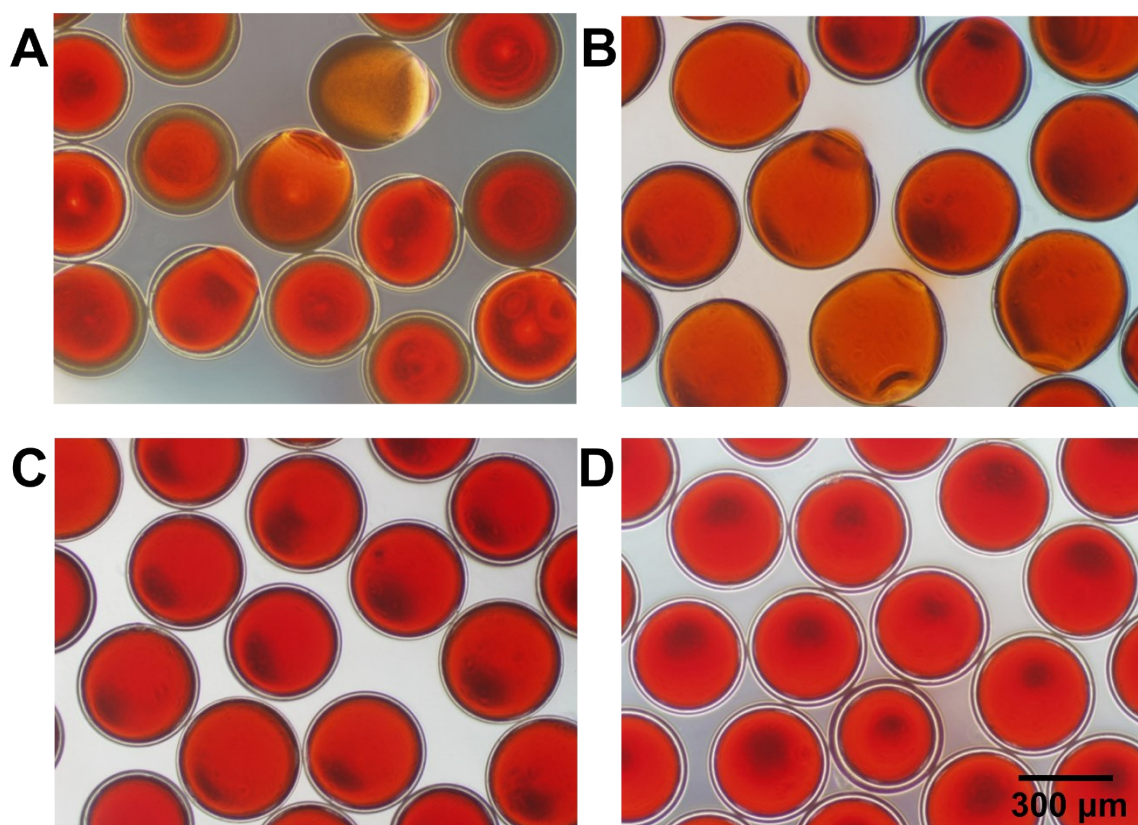

**Fig. S2** Effect of the volume ratio of mixed solvents on droplets generation. (A) 1:1. (B) 1:2. (C) 1:3. (D) 1:4.

**Table S1** Effects of the concentration of HPMCAS-HF on droplets generation.

| Concentration of HPMCAS-HF (mg/mL) | 60 | 70 | 80 | 90 | 100 | 110 | 120 | 130 | 140 |
|------------------------------------|----|----|----|----|-----|-----|-----|-----|-----|
| Droplets Generation                | ×  | ×  | √  | √  | √   | √   | √   | ×   | ×   |

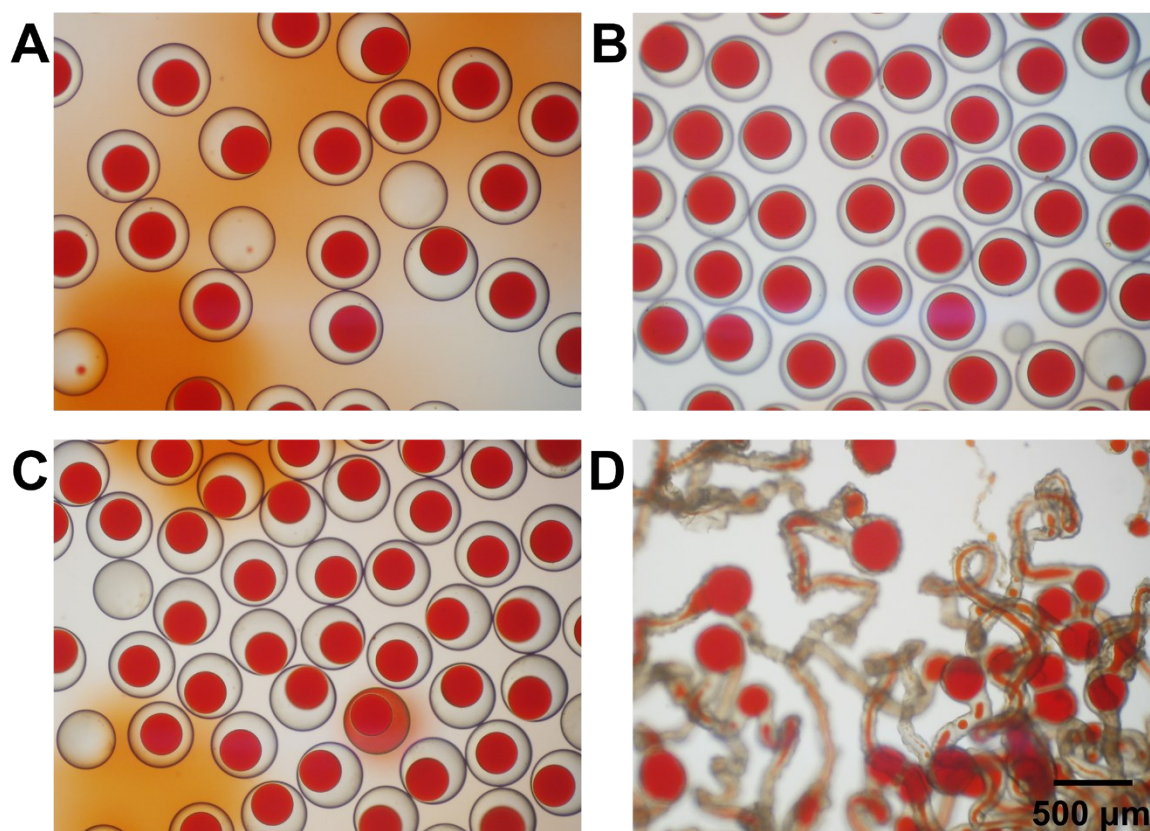

**Fig. S3** Effect of the concentration of HPMCAS-HF on droplets generation. (A) 80 mg/mL. (B) 100 mg/mL. (C) 120 mg/mL. (D) 140 mg/mL.

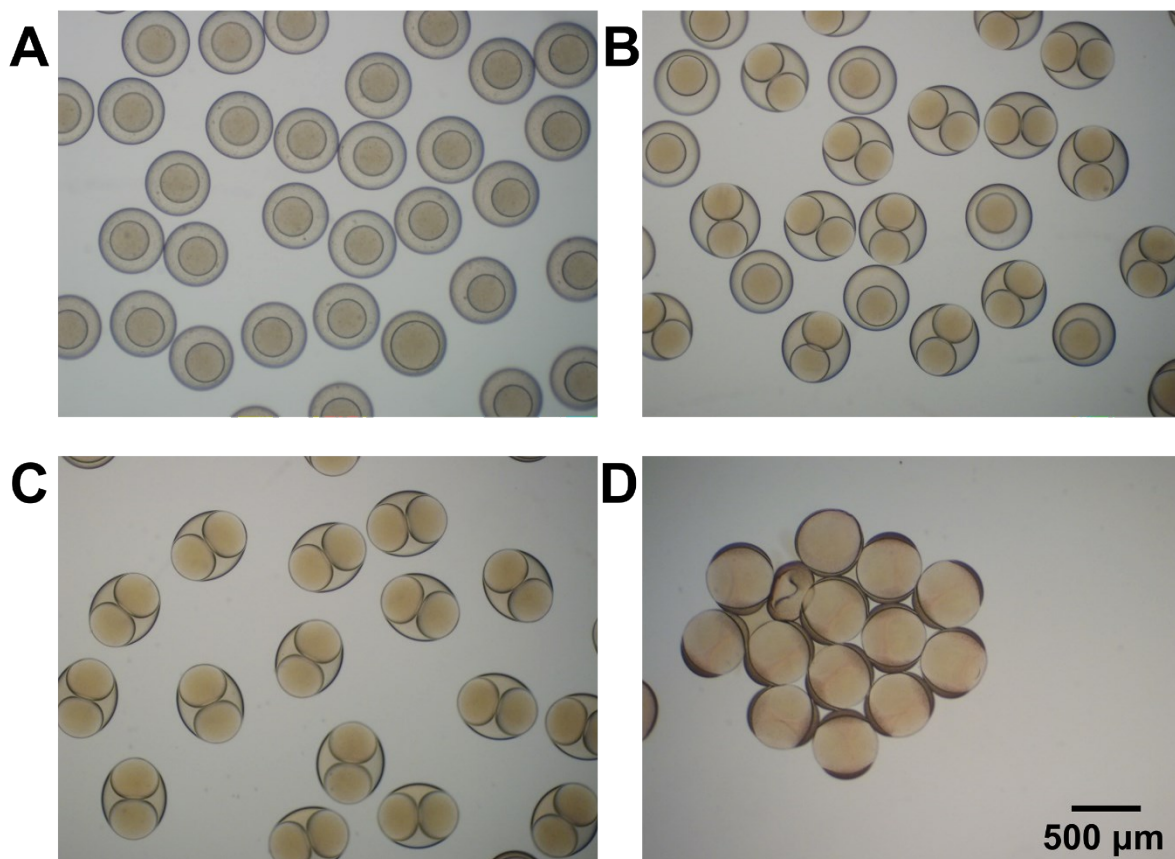

**Fig. S4** Effects of the internal flow rate on droplets generation. (A)  $v_i=3 \mu\text{L}/\text{min}$ . (B)  $v_i=4 \mu\text{L}/\text{min}$ . (C)  $v_i=5 \mu\text{L}/\text{min}$ . (D)  $v_i=6 \mu\text{L}/\text{min}$ . ( $v_m=15 \mu\text{L}/\text{min}$ ,  $v_o=120 \mu\text{L}/\text{min}$ ).

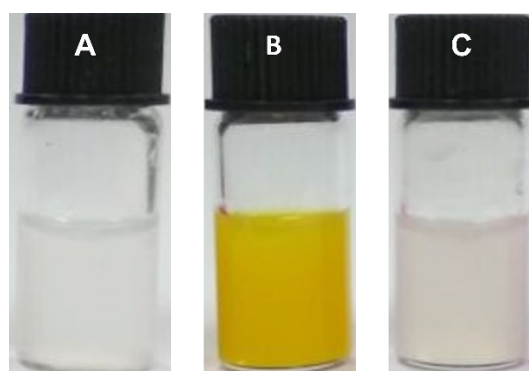

**Fig. S5** The dispersion of different nanoparticles in inner aqueous phase after 3 hours. (A) PLGA NPs. (B) PLGA-Cur NPs. (C) PLGA-Dex NPs. The concentration is 20 mg/mL.

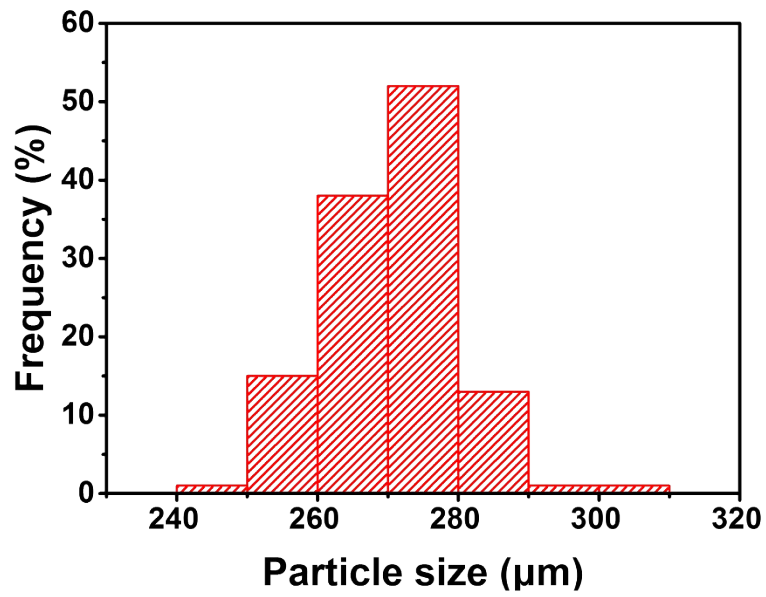

**Fig. S6** The particles size of the nano-in-micro microcapsules.

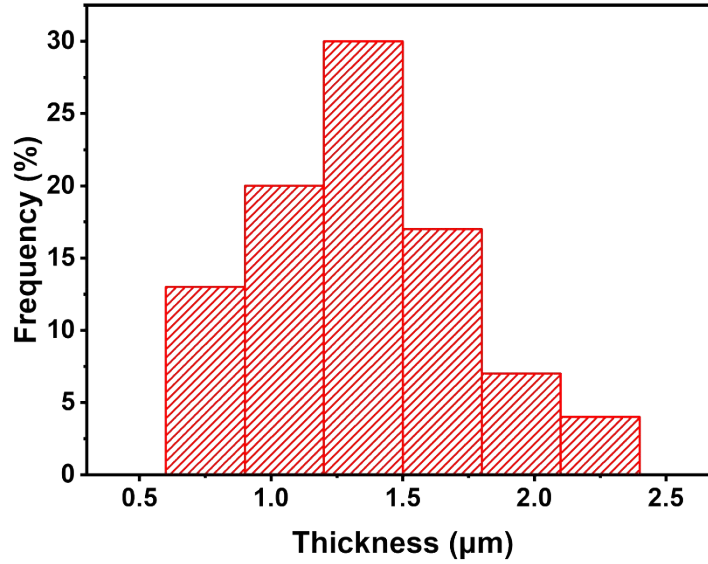

**Fig. S7** The thickness of concave lamella of the nano-in-micro microcapsules.

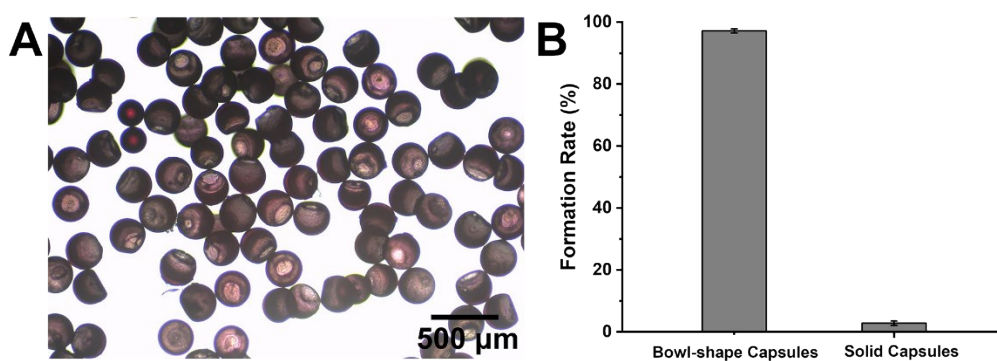

**Fig. S8** (A) Optical microscopy image of the nano-in-micro microcapsules. (B) The formation rate of bowl-shape capsules after solidification. Putted the microcapsules on the plate, randomly chosen 5 fields of view to take pictures and counted the number of microcapsules.

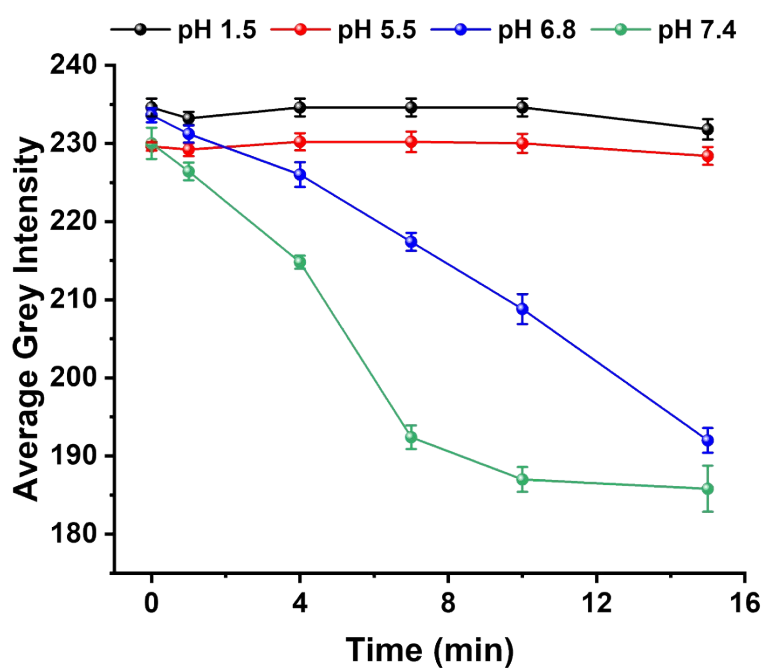

**Fig. S9** Variation of color depth of nano-in-micro microcapsules over time under different pH conditions.

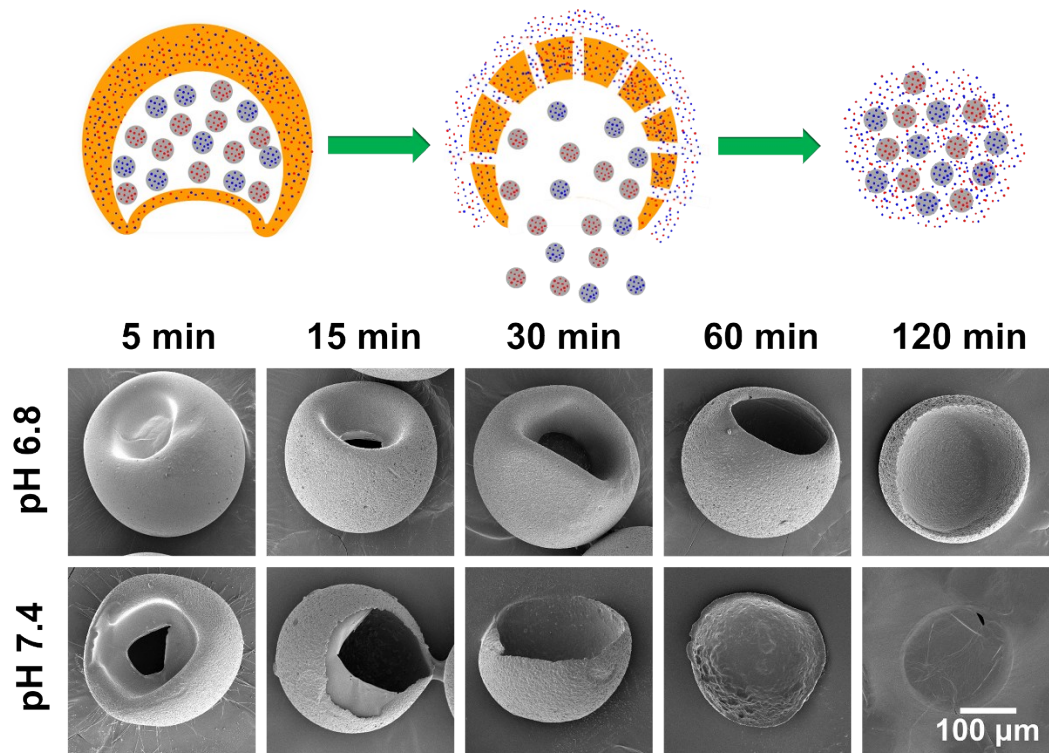

**Fig. S10** The partial enlargement of the decomposition of single microcapsules at pH 6.8 and 7.4.

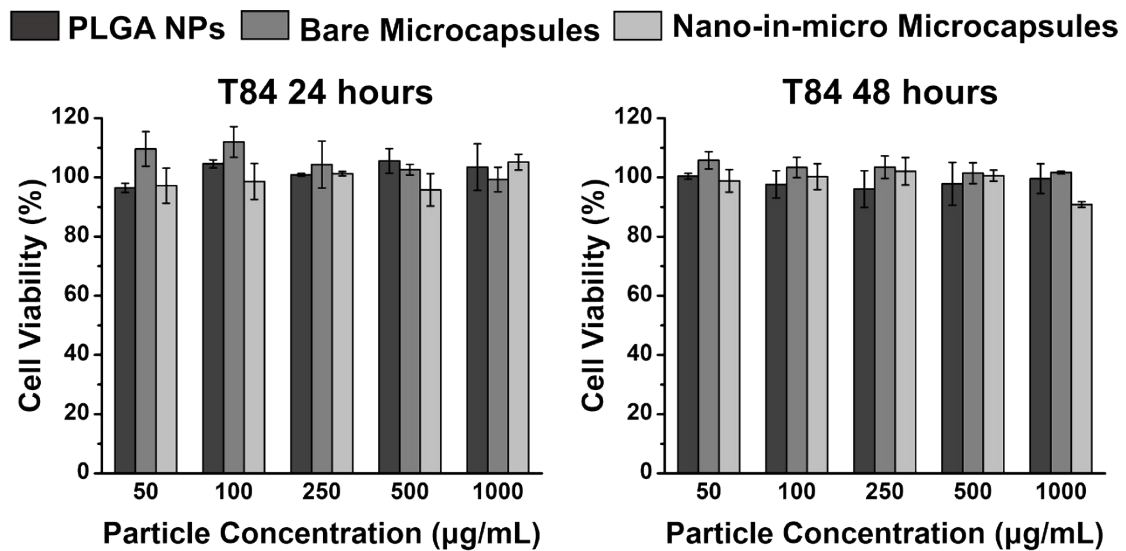

**Fig. S11** Viability of T84 cells after 24 and 48 h incubation with different concentrations of PLGA NPs, bare microcapsules, and nano-in-micro microcapsules.

**Table S2** Primer sequences used for quantitative real-time polymerase chain reaction.

| Gene Name |   | Sequences (5' → 3')      |
|-----------|---|--------------------------|
| β-actin   | F | GGCTGTATTCCCCTCCATCG     |
|           | R | CCAGTTGGTAACAATGCCATGT   |
| TNF-α     | F | CACCACGCTCTTCTGTCTAC     |
|           | R | ACGGTGTGGGTGAGGAG        |
| IL-1β     | F | CTGTGACTCATGGGATGATGATG  |
|           | R | CGGAGCCTGTAGTGCAGTTG     |
| IL-6      | F | CCAAGAGGTGAGTGCTTCCC     |
|           | R | CTGTTGTTTCAGACTCTCTCCCT  |
| iNOS      | F | GTTCTCAGCCCAACAATAACAAGA |
|           | R | GTGGACGGGTCGATGTCAC      |

**Table S3** Peroral dosage forms for the treatment of inflammatory bowel disease.

| Size                          | Composition                                           | Drug                    | Release mechanism                              | Reference |
|-------------------------------|-------------------------------------------------------|-------------------------|------------------------------------------------|-----------|
| Nanocapsule                   | Tannic acid, Pluronic F-68                            | Dexamethasone           | Esterases- dependent release                   | [1]       |
| Nanocapsule                   | PLGA, Eudragit® S100                                  | Budesonide              | pH- dependent release                          | [2]       |
| Microcapsule                  | Chitosan, alginate                                    | Antibody-coated NCs     | pH- dependent release                          | [3]       |
| Microcapsule                  | Acetalated dextran                                    | Dexamethasone           | pH- dependent release                          | [4]       |
| Nano-in-micro capsule         | Phenylboronic esters-modified dextran, HPMCAS         | Rifaximin               | pH and ROS-dependent release                   | [5]       |
| Nano-in-micro capsule         | Halloysite nanotubes, HPMCAS                          | Curcumin                | pH- dependent release                          | [6]       |
| Nano-in-nano-in-micro capsule | Hyaluronic acid functionalized porous silicon, HPMCAS | Budesonide              | Enzyme and pH- dependent release               | [7]       |
| Nano-in-micro capsule         | PLGA NPs, HPMCAS                                      | Curcumin, Dexamethasone | pH- dependent release and release by diffusion | This work |

## References

[1] X. Wang, J. J. Yan, L. Wang, D. Pan, R. Yang, Y. P. Xu, J. Sheng, Q. Huang, H. Zhao and M. Yang, Rational design of polyphenol-poloxamer nanovesicles for targeting inflammatory bowel disease therapy, *Chem. Mater.*, 2018, **30**, 4073-4080.



- [2] H. Ali, B. Weigmann, M. F. Neurath, E. M. Collnot, M. Windbergs and C. M. Lehr, Budesonide loaded nanoparticles with pH-sensitive coating for improved mucosal targeting in mouse models of inflammatory bowel diseases, *J. Controlled Release*, 2014, **183**, 167-177.
- [3] R. Ghaffarian, E. P. Herrero, H. Oh, S. R. Raghavan and S. Muro, Chitosan-alginate microcapsules provide gastric protection and intestinal release of ICAM-1-targeting nanocarriers, enabling GI targeting in vivo, *Adv. Funct. Mater.*, 2016, **26**, 3382-3393.
- [4] A. Stubelius, W. Sheng, S. Lee, J. Olejniczak, M. Guma and A. Almutairi, Disease-triggered drug release effectively prevents acute inflammatory flare-ups, achieving reduced dosing, *Small*, 2018, **14**, e1800703.
- [5] S. Bertoni, Z. Liu, A. Correia, J. P. Martins, A. Rahikkala, F. Fontana, M. Kemell, D. Liu, B. Albertini, N. Passerini, W. Li and H. A. Santos, pH and reactive oxygen species-sequential responsive nano-in-micro composite for targeted therapy of inflammatory bowel disease, *Adv. Funct. Mater.*, 2018, **28**, 1806175.
- [6] N. Kerdsakundee, W. Li, J. P. Martins, Z. Liu, F. Zhang, M. Kemell, A. Correia, Y. Ding, M. Airavaara, J. Hirvonen, R. Wiwattanapatapee and H. A. Santos, Multifunctional nanotube-mucoadhesive poly(methyl vinyl ether-co-maleic acid)@hydroxypropyl methylcellulose acetate succinate composite for site-specific oral drug delivery, *Adv. Healthc. Mater.*, 2017, **6**, 1700629.
- [7] W. Li, Y. Li, Z. Liu, N. Kerdsakundee, M. Zhang, F. Zhang, X. Liu, T. Bauleth-Ramos, W. Lian, E. Makila, M. Kemell, Y. Ding, B. Sarmiento, R. Wiwattanapatapee, J. Salonen, H. Zhang, J. T. Hirvonen, D. Liu, X. Deng and H. A. Santos, Hierarchical structured and programmed vehicles deliver drugs locally to inflamed sites of intestine, *Biomaterials*, 2018, **185**, 322-332.
